# Supplementary material for: Profile of the Immune and Inflammatory Response in Individuals With Prediabetes and Type 2 Diabetes
Source: Oxford University Press journal article supplement (doi:10.2337/dc14-3008), 2015-04-15

Profile of the Immune and Inflammatory Response  
in Individuals with Prediabetes and Type 2 Diabetes

Vera Grossmann<sup>1</sup>, Volker H Schmitt<sup>2</sup>, Tanja Zeller<sup>4,5</sup>, Marina Panova-Noeva<sup>3</sup>,  
Andreas Schulz<sup>3</sup>, Dagmar Laubert-Reh<sup>3</sup>, Claus Juenger<sup>3</sup>, Renate B Schnabel<sup>4,5</sup>,  
Tobias G J Abt<sup>2</sup>, Rafael Laskowski<sup>2</sup>, Jörg Wiltink<sup>6</sup>, Eberhard Schulz<sup>2</sup>, Stefan  
Blankenberg<sup>4,5</sup>, Karl J Lackner<sup>7</sup>, Thomas Münzel<sup>2,8</sup>, Philipp S Wild<sup>3,1,8</sup>

<sup>1</sup> Center for Thrombosis and Hemostasis (CTH), University Medical Center Mainz, Mainz, Germany

<sup>2</sup> Department of Medicine 2, University Medical Center Mainz, Mainz, Germany

<sup>3</sup> Preventive Cardiology and Preventive Medicine, Department of Medicine 2, University Medical Center Mainz, Mainz, Germany

<sup>4</sup> Clinic for General and Interventional Cardiology, University Heart Centre Hamburg, Germany

<sup>5</sup> DZHK (German Center for Cardiovascular Research), Partner Site Hamburg, Lübeck, Kiel, Germany

<sup>6</sup> Department of Psychosomatic Medicine and Psychotherapy, University Medical Center Mainz, Mainz, Germany

<sup>7</sup> Institute for Clinical Chemistry and Laboratory Medicine, University Medical Center Mainz, Mainz, Germany

<sup>8</sup> (DZHK) German Center for Cardiovascular Research, Partner Site Rhine-Main, Mainz, Germany

*Definitions of Cardiovascular Risk Factors and Comorbidities*

Height was measured ( $\pm 0.1$  cm) as the maximum distance to the uppermost position on the head from heels, with the individual standing barefoot. Body weight was measured ( $\pm 0.1$  kg) using a digital weighing scale. Waist circumference was measured midway between the iliac crest and the lower rib margin at the end of normal expiration. All anthropometric parameters were measured by trained nurses. Body-mass index (BMI) and weight to height ratio (WHtR) were calculated. Blood pressure was measured in triplicates on the left upper arm after resting for at least 5 minutes in seated position. For evaluation, the average values of the three systolic (SBP) and diastolic (DBP) blood pressure measurements were used. Hypertension was defined as systolic blood pressure  $\geq 140$  mmHg or diastolic blood pressure  $\geq 90$  mmHg at rest obtained as the mean of the second and third measurement, or by taking any antihypertensive drugs within the last 2 weeks. Dyslipidemia was defined as diagnosis of dyslipidemia made by a physician, a LDL/HDL-ratio of  $> 3.5$  or triglycerides  $\geq 150$  mg/dL. Data of cardiovascular disease were collected in a computer-assisted personal interview and questionnaires. Patients were classified as having a cardiovascular event based on the medical history or diagnosis of cardiac arterial disease (CAD), myocardial infarction (MI), stroke, peripheral artery disease (PAD), arterial fibrillation (AF) or chronic heart failure (CHF). In general, all examinations were performed according to standard operating procedures by certified medical technical assistants.

**Supplementary Figure S1.** Flow diagram for the study sample in the present analysis. Blue colored boxes indicate an inclusion and red colored an exclusion of subjects from the study population. All included subjects were successfully investigated for HbA<sub>1c</sub> concentration.

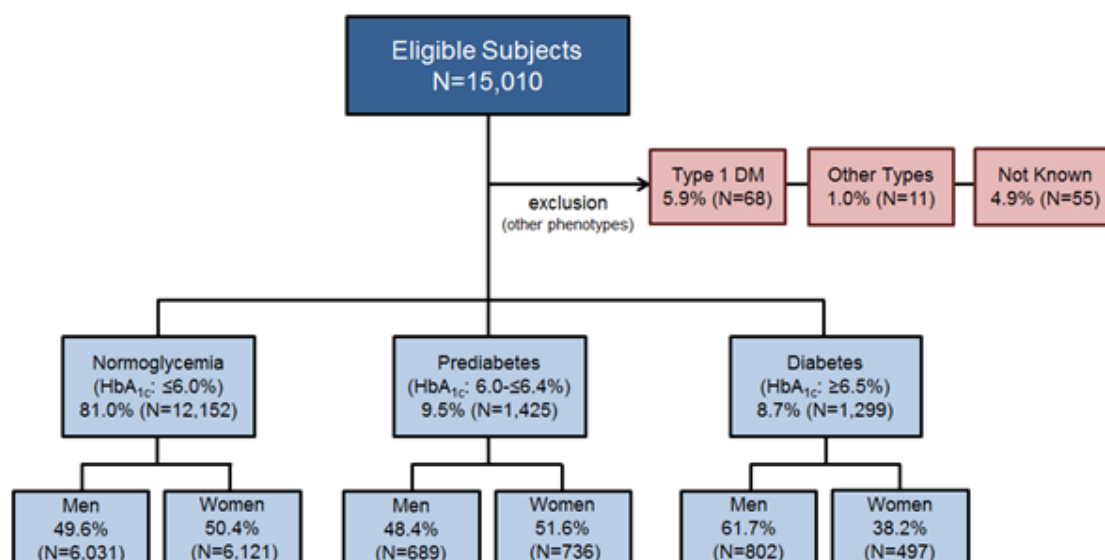

## SUPPLEMENTARY DATA

**Supplementary Figure S2.** Distribution of Prediabetes (A) and diabetes (B) according to age in the GHS sample.

(A)

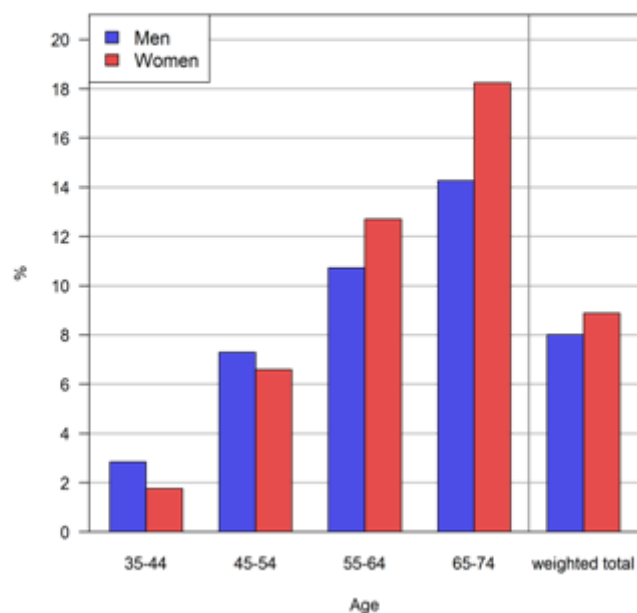

(B)

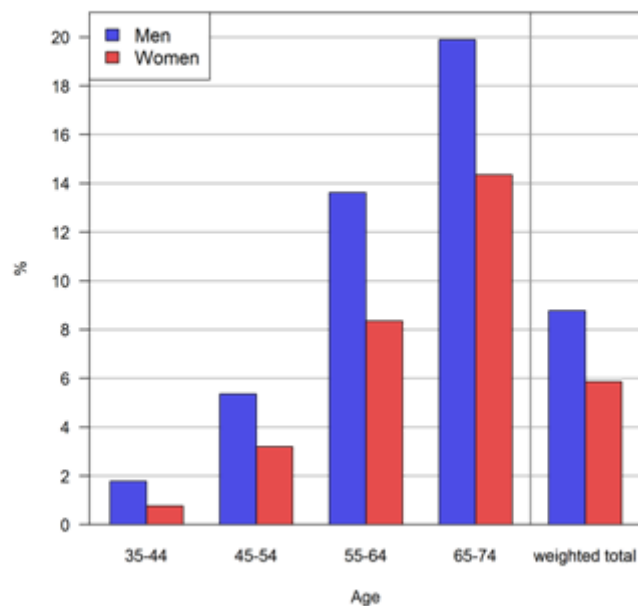

**Supplementary Figure S3.** Relative change of inflammatory and immune markers in prediabetes and diabetes compared to normoglycemia. Relative change of the concentration of inflammatory and immune biomarkers in subjects with prediabetes and T2D diseased subjects compared to normoglycemic study participants (A). Sex-specific relative change of inflammatory and immune markers in individuals with prediabetes (B) and diabetes (C) compared to normoglycemia.

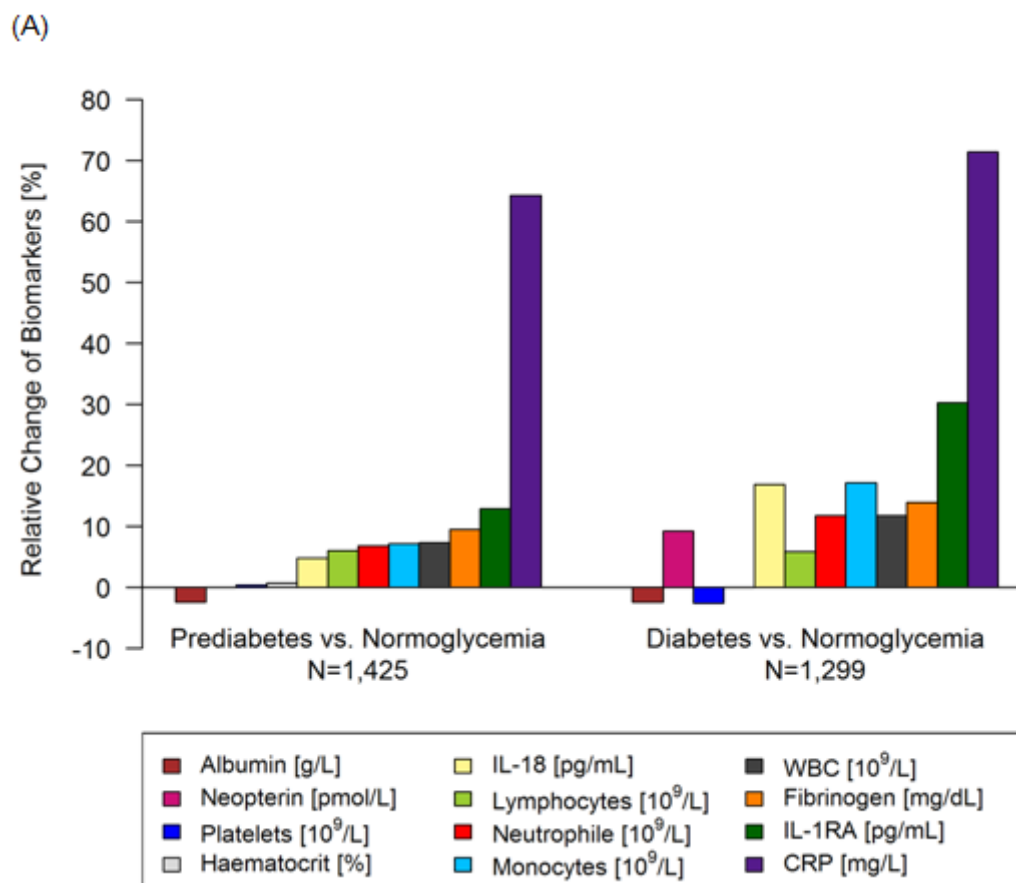

## SUPPLEMENTARY DATA

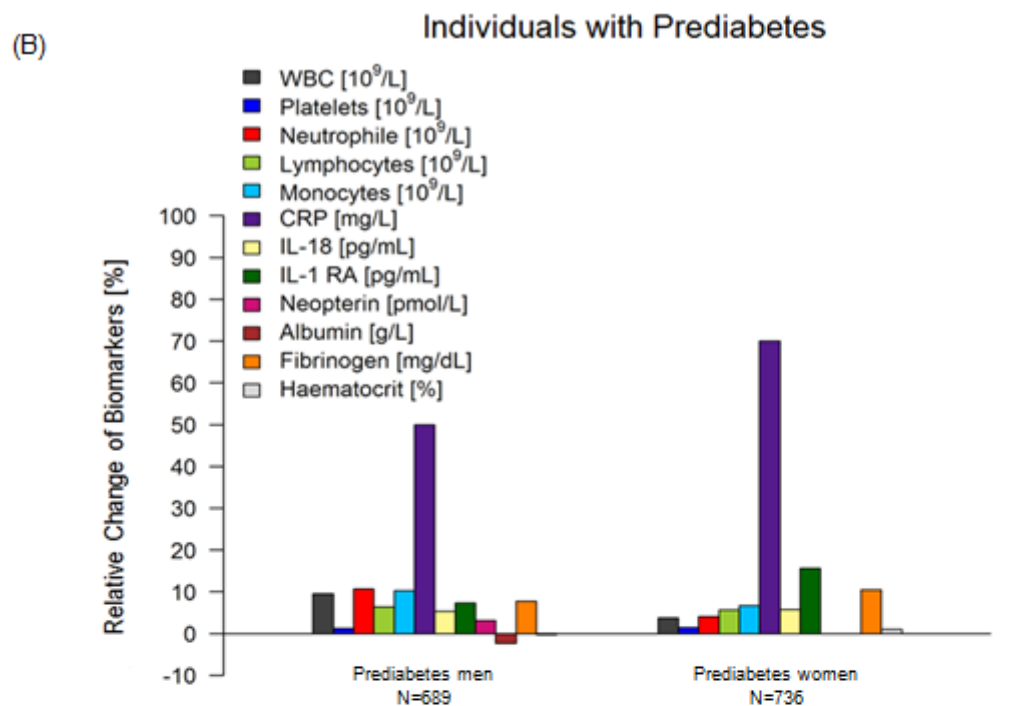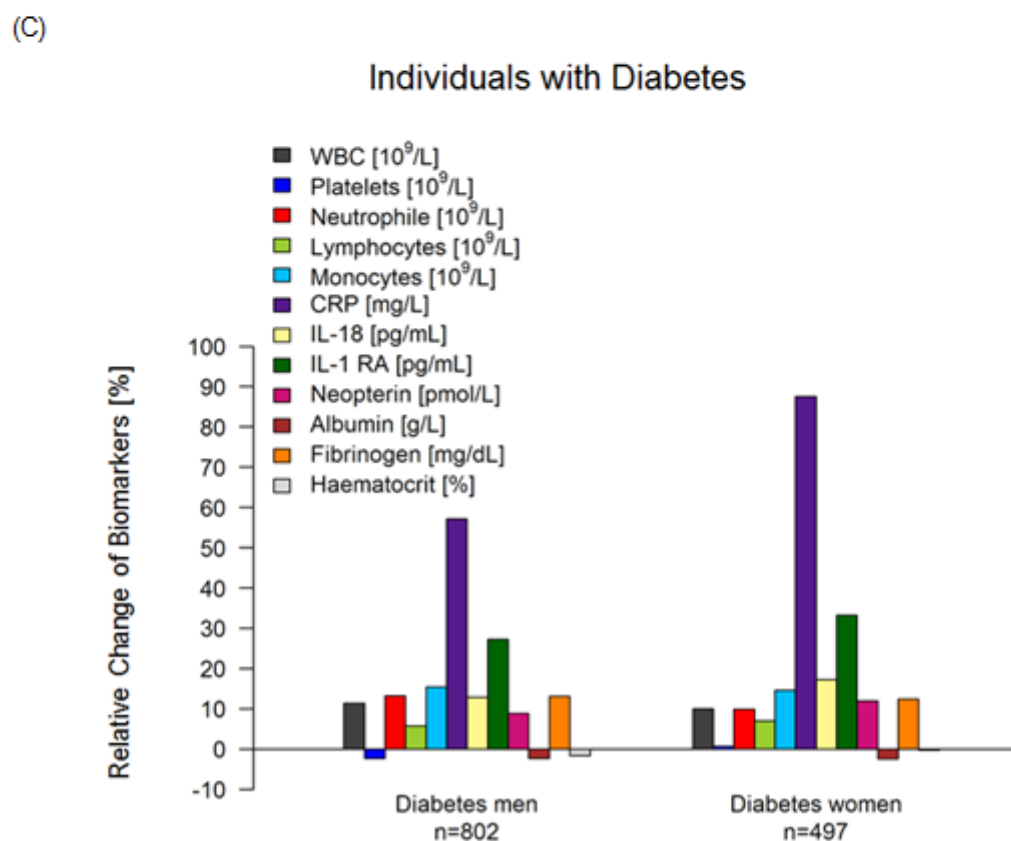

### *Correlation analysis between biomarkers*

When focusing on correlations between inflammatory and immune biomarkers in subjects affected with T2D, strong positive correlations were detected between fibrinogen and CRP ( $r=0.53$ ), and moderate correlations between IL-1RA and WBC ( $r=0.41$ ), IL-1RA and CRP ( $r=0.36$ ), and IL-1RA and granulocytes ( $r=0.36$ ). A moderate inverse correlation was observed between albumin and CRP ( $r=0.31$ ). With respect to the associations in prediabetic individuals, strong positive correlations were detected between fibrinogen and CRP ( $r=0.53$ ), and moderate correlations between IL-1RA and WBC ( $r=0.39$ ), IL-1RA and granulocytes ( $r=0.38$ ), IL-1RA and monocytes ( $r=0.33$ ), and IL-1RA and CRP ( $r=0.30$ ). Comparable data were observed in individuals with normal HbA<sub>1c</sub> concentrations, i.e. a strong positive correlation was detected between fibrinogen and CRP ( $r=0.54$ ), moderate correlations between IL-1RA and WBC ( $r=0.41$ ), IL-1RA and granulocytes ( $r=0.42$ ), and IL-1RA and CRP ( $r=0.34$ ); moderate negative correlation was observed between albumin and CRP ( $r=0.24$ ). Furthermore, WBC correlated with granulocytes, lymphocytes and monocytes in the diabetic and prediabetic cohort and individuals with normal HbA<sub>1c</sub> concentration, due to the fact, that granulocyte, lymphocyte and monocyte numbers were calculated according from the WBC count.

Markers of inflammation were correlated with cardiovascular risk factors in individuals with T2D. Moderate correlations were found between IL-1RA and BMI ( $r=0.42$ ), as well as CRP and BMI ( $r=0.31$ ). This was comparable in subjects with prediabetes and the normoglycemic group (prediabetes: CRP and BMI,  $r=0.38$ ; IL-1RA and BMI,  $r=0.38$ , normoglycemic group: CRP and BMI,  $r=0.38$ ; IL-1RA and BMI,  $r=0.32$ ).

# SUPPLEMENTARY DATA

**Supplementary Table S1.** Specific medical treatment of patients having T2D.

| ATC Code | Therapy                                                                                      | %    |
|----------|----------------------------------------------------------------------------------------------|------|
| A10      | Drugs used in Diabetes                                                                       | 87.0 |
| A10A     | Insulin and analogues                                                                        | 28.4 |
| A10B     | Blood glucose lowering drugd excl. Insulins                                                  | 72.2 |
| A10AB    | Insulins and analogues for injection, fast-acting                                            | 20.6 |
| A10AC    | Insulins and analogues for injection, intermediate-acting                                    | 13.1 |
| A10AD    | Insulins and analogues for injection, intermediate- or long-acting combined with fast-acting | 2.4  |
| A10AE    | Insulins and analogues for injection, long-acting                                            | 8.6  |
| A10BA    | Biguanides                                                                                   | 56.5 |
| A10BB    | Sulfonamides, urea derivatives                                                               | 17.6 |
| A10BD    | Combinations of oral blood glucose lowering drugs                                            | 5.8  |
| A10BF    | Alpha glucosidase inhibitors                                                                 | 1.1  |
| A10BG    | Thiazolidinediones                                                                           | 3.6  |
| A10BH    | Dipeptidyl peptidase 4 (DPP-4) inhibitors                                                    | 2.9  |
| A10BX    | Other blood glucose lowering drugs, excl. insulins                                           | 3.8  |

# SUPPLEMENTARY DATA

**Supplementary Table S2.** Concentrations of inflammatory and immune biomarkers according to presence of cardiovascular disease within the subgroup with prediabetes (A) and diabetes (B). Data are presented as median (Q1, Q3).

(A)

| Variable                  | Prediabetes without CVD<br>(68.0%, N=1,106) | Prediabetes with CVD<br>(32.0%, N=273) | <i>P</i> |
|---------------------------|---------------------------------------------|----------------------------------------|----------|
| WBC [ $10^9/L$ ]          | 7.20 (6.08/8.54)                            | 7.50 (6.09/8.92)                       | 0.043    |
| Granulocytes [ $10^9/L$ ] | 277.0 (239.0/329.8)                         | 252.0 (218.0/298.0)                    | < 0.0001 |
| Lymphocytes [ $10^9/L$ ]  | 61.99±8.27                                  | 63.57±8.42                             | 0.0055   |
| Monocytes [ $10^9/L$ ]    | 27.36±7.56                                  | 25.28±7.43                             | < 0.0001 |
| Platelets [ $10^9/L$ ]    | 5.80 (5.00/6.80)                            | 6.10 (5.20/7.30)                       | 0.0038   |
| CRP [mg/L]                | 2.30 (1.10/4.30)                            | 2.50 (1.20/4.70)                       | 0.13     |
| IL-18 [pg/mL]             | 230 (180/295)                               | 237 (184/336)                          | 0.42     |
| IL-1RA [pg/mL]            | 347.6 (266.1/480.8)                         | 362.3 (282.5/517.0)                    | 0.19     |
| Neopterin [pmol/L]        | 5.34 (4.70/6.13)                            | 5.96 (4.81/7.10)                       | 0.028    |
| Albumin [g/L]             | 41.0±3.1                                    | 40.7±2.7                               | 0.12     |
| Fibrinogen [mg/dL]        | 340.0 (295.0/403.0)                         | 364.0 (308.0/443.0)                    | < 0.0001 |
| Haematocrit [%]           | 42.0±3.3                                    | 42.3±3.6                               | 0.25     |

(B)

| Variable                  | T2D without CVD<br>(68.0%, N=860) | T2D with CVD<br>(32.0%, N=378) | <i>P</i> |
|---------------------------|-----------------------------------|--------------------------------|----------|
| WBC [ $10^9/L$ ]          | 7.43 (6.22/8.65)                  | 7.90 (6.70/9.19)               | < 0.0001 |
| Granulocytes [ $10^9/L$ ] | 267.0 (221.0/311.0)               | 253.0 (215.0/304.6)            | 0.055    |
| Lymphocytes [ $10^9/L$ ]  | 63.5 (58.1/68.5)                  | 65.0 (58.5/70.2)               | 0.014    |
| Monocytes [ $10^9/L$ ]    | 25.80 (21.30/30.41)               | 24.35 (18.84/29.60)            | 0.00047  |
| Platelets [ $10^9/L$ ]    | 6.00 (5.10/7.00)                  | 6.20 (5.34/7.26)               | 0.018    |
| CRP [mg/L]                | 2.40 (1.20/5.00)                  | 2.55 (1.40/5.50)               | 0.094    |
| IL-18 [pg/mL]             | 262 (203/339)                     | 248 (206/329)                  | 0.78     |
| IL-1RA [pg/mL]            | 385 (283/527)                     | 448 (323/598)                  | 0.0082   |
| Neopterin [pmol/L]        | 5.70 (4.90/6.70)                  | 6.60 (5.60/8.39)               | < 0.0001 |
| Albumin [g/L]             | 41.0 (39.0/43.0)                  | 41.0 (39.0/43.0)               | 0.0032   |
| Fibrinogen [mg/dL]        | 349.0 (302.0/406.0)               | 383.0 (329.0/452.0)            | < 0.0001 |
| Haematocrit [%]           | 41.9 (39.6/44.4)                  | 41.8 (39.6/44.1)               | 0.24     |



## SUPPLEMENTARY DATA

**Supplementary Table S3.** Frequency of cardiovascular disease according to diabetes duration and treatment.

| Duration of T2D       | Frequency of CVD (%/N) |
|-----------------------|------------------------|
| <1 year               | 8.8% (26)              |
| 1-2 years             | 6.8% (20)              |
| 2-5 years             | 21.7% (64)             |
| 5-10 years            | 30.2% (89)             |
| >10 years             | 32.5% (96)             |
| Treatment of Diabetes | Frequency of CVD (%/N) |
| No treatment          | 3.3% (12)              |
| Dietary only          | 3.9% (14)              |
| NIDDM                 | 39.2% (142)            |
| IDDM                  | 30.1% (109)            |

# SUPPLEMENTARY DATA

**Supplementary Table S4.** Concentration of inflammatory and immune biomarkers according to disease treatment.

| Variable                  | No therapy/Dietary  | NIDDM               | IDDM                | <i>P</i> for trend | <i>P</i> (NIDDM vs. IDDM) |
|---------------------------|---------------------|---------------------|---------------------|--------------------|---------------------------|
| Size [N]                  | 109                 | 563                 | 358                 |                    |                           |
| WBC [ $10^9/L$ ]          | 7.2 (6.1/8.7)       | 7.5 (6.3/8.7)       | 7.8 (6.5/9.2)       | 0.00076            | 0.0084                    |
| Granulocytes [ $10^9/L$ ] | 4.52 (3.76/5.57)    | 4.76 (3.83/5.74)    | 5.05 (4.03/6.06)    | 0.0017             | 0.012                     |
| Lymphocytes [ $10^9/L$ ]  | 1.79 (1.43/2.26)    | 1.83 (1.47/2.29)    | 1.86 (1.46/2.30)    | 0.62               | 0.92                      |
| Monocytes [ $10^9/L$ ]    | 0.43 (0.33/0.52)    | 0.45 (0.36/0.53)    | 0.48 (0.38/0.58)    | 0.00055            | 0.0067                    |
| Platelets [ $10^9/L$ ]    | 249.5 (216.4/305.2) | 261.0 (217.0/310.8) | 259.0 (217.0/300.6) | 0.78               | 0.47                      |
| CRP [mg/L]                | 2.4 (1.2/5.2)       | 2.1 (1.1/4.5)       | 2.6 (1.4/5.4)       | 0.032              | 0.0022                    |
| IL-1RA [pg/mL]            | 346 (237/553)       | 400 (286/505)       | 398 (297/580)       | <0.0001            | 0.27                      |
| IL-18 [pg/mL]             | 284 (205/342)       | 263 (199/343)       | 249 (198/339)       | <0.0001            | 0.83                      |
| Neopterin [pmol/L]        | 5.9 (5.1/7.9)       | 5.7 (4.9/7.1)       | 6.4 (5.3/8.2)       | <0.0001            | 0.0058                    |
| Albumin [g/L]             | 41.0 (39.0/43.0)    | 41.0 (39.0/43.0)    | 41.0 (39.0/43.0)    | 0.0089             | 0.0027                    |
| Fibrinogen [mg/dL]        | 367 (317/423)       | 347 (298/404)       | 373 (323/441)       | 0.0015             | <0.0001                   |
| Haematokrit [%]           | 41.5 (39.6/43.9)    | 41.4 (39.2/43.7)    | 42.0 (39.7/44.2)    | 0.055              | 0.041                     |

Variables are presented as median with 25<sup>th</sup> and 75<sup>th</sup> percentile.

**Supplementary Table S5.** Concentration of inflammatory and immune biomarkers according to diabetes disease duration.

|                           | Duration of DM | Mean (SD)   | Median (Q1/Q3)   |
|---------------------------|----------------|-------------|------------------|
| WBC [ $10^9/L$ ]          | ≤1 year        | 7.80 (2.06) | 7.63 (6.17/9.18) |
|                           | 1-2 years      | 7.90 (2.38) | 7.54 (6.23/8.70) |
|                           | 2-5 years      | 7.97 (2.05) | 7.66 (6.50/9.14) |
|                           | 5-10 years     | 7.76 (2.09) | 7.53 (6.29/8.68) |
|                           | > 10 years     | 7.84 (2.12) | 7.56 (6.33/8.96) |
| Platelets [ $10^9/L$ ]    | ≤1 year        | 266 (64.5)  | 258 (226/305)    |
|                           | 1-2 years      | 255 (76.6)  | 244 (198/306)    |
|                           | 2-5 years      | 278 (90.4)  | 270 (224/317)    |
|                           | 5-10 years     | 259 (64.8)  | 254 (215/302)    |
|                           | > 10 years     | 262 (68.3)  | 258 (215/302)    |
| Granulocytes [ $10^9/L$ ] | ≤1 year        | 62.7 (7.67) | 62.6 (57.5/68.3) |
|                           | 1-2 years      | 63.6 (7.76) | 63.0 (58.5/68.5) |
|                           | 2-5 years      | 63.8 (8.01) | 64.1 (58.2/69.5) |
|                           | 5-10 years     | 64.3 (7.81) | 64.2 (59.7/69.6) |
|                           | > 10 years     | 65.4 (7.78) | 66.0 (60.1/71.0) |
| Lymphocytes [ $10^9/L$ ]  | ≤1 year        | 26.6 (6.90) | 26.7 (22.4/31.5) |
|                           | 1-2 years      | 25.7 (7.08) | 25.9 (20.5/29.7) |
|                           | 2-5 years      | 25.5 (7.24) | 25.4 (19.9/30.2) |
|                           | 5-10 years     | 24.9 (6.80) | 24.9 (20.5/29.2) |
|                           | > 10 years     | 23.6 (7.12) | 22.7 (18.4/28.4) |
| Monocytes [ $10^9/L$ ]    | ≤1 year        | 6.20 (1.70) | 6.00 (5.10/7.00) |
|                           | 1-2 years      | 6.10 (1.26) | 6.00 (5.14/6.96) |
|                           | 2-5 years      | 5.98 (1.58) | 5.70 (5.00/6.60) |
|                           | 5-10 years     | 6.25 (1.55) | 6.05 (5.20/7.10) |
|                           | > 10 years     | 6.22 (1.61) | 5.90 (5.20/7.18) |
| CRP [mg/L]                | ≤1 year        | 4.79 (6.91) | 2.60 (1.30/5.00) |
|                           | 1-2 years      | 4.85 (8.69) | 2.50 (1.40/5.19) |
|                           | 2-5 years      | 4.16 (8.56) | 2.30 (1.12/4.68) |
|                           | 5-10 years     | 4.90 (12.2) | 2.40 (1.20/5.10) |
|                           | > 10 years     | 4.39 (7.06) | 2.20 (1.10/5.00) |
| IL-18 [pg/mL]             | ≤1 year        | 268 (100.0) | 258 (196/326)    |
|                           | 1-2 years      | 274 (104)   | 258 (189/332)    |
|                           | 2-5 years      | 294 (113)   | 285 (219/355)    |
|                           | 5-10 years     | 283 (110)   | 256 (200/350)    |
|                           | > 10 years     | 289 (120)   | 268 (208/350)    |
| IL-1RA [pg/mL]            | ≤1 year        | 445 (223)   | 409 (298/513)    |
|                           | 1-2 years      | 514 (311)   | 424 (346/550)    |
|                           | 2-5 years      | 450 (201)   | 428 (282/539)    |
|                           | 5-10 years     | 458 (259)   | 401 (297/561)    |
|                           | > 10 years     | 441 (222)   | 367 (287/545)    |
| Neopterin [pmol/L]        | ≤1 year        | 6.25 (2.15) | 5.66 (4.60/6.97) |
|                           | 1-2 years      | 7.22 (4.60) | 5.73 (5.22/7.08) |

# SUPPLEMENTARY DATA

|                    |            |             |                  |
|--------------------|------------|-------------|------------------|
|                    | 2-5 years  | 6.13 (2.05) | 5.80 (5.00/6.83) |
|                    | 5-10 years | 6.98 (3.53) | 6.27 (5.21/7.69) |
|                    | > 10 years | 9.47 (15.3) | 6.60 (5.50/8.55) |
| Albumin [g/L]      | ≤1 year    | 40.9 (3.18) | 41.0 (39.0/43.0) |
|                    | 1-2 years  | 41.0 (3.07) | 41.0 (39.0/43.0) |
|                    | 2-5 years  | 41.1 (3.00) | 41.0 (39.0/43.0) |
|                    | 5-10 years | 41.0 (3.17) | 41.0 (39.0/43.0) |
|                    | > 10 years | 40.6 (3.38) | 41.0 (39.0/43.0) |
| Fibrinogen [mg/dL] | ≤1 year    | 384 (96.4)  | 375 (316/432)    |
|                    | 1-2 years  | 361 (79.4)  | 355 (307/405)    |
|                    | 2-5 years  | 364 (90.4)  | 354 (302/410)    |
|                    | 5-10 years | 377 (101)   | 361 (309/424)    |
|                    | > 10 years | 384 (104)   | 365 (319/428)    |
| Haematokrit [%]    | ≤1 year    | 42.1 (3.58) | 42.2 (40.1/44.3) |
|                    | 1-2 years  | 41.4 (3.09) | 41.4 (38.9/44.0) |
|                    | 2-5 years  | 41.6 (3.45) | 41.7 (39.8/43.6) |
|                    | 5-10 years | 41.5 (3.70) | 41.4 (39.4/44.0) |
|                    | > 10 years | 41.4 (3.75) | 41.6 (39.0/44.0) |

SUPPLEMENTARY DATA

**Supplementary Figure S4.** Impact of inflammatory and immune biomarkers on the presence of prediabetes and diabetes. A logistic model with diabetes or prediabetes vs normoglycemia and diabetes vs prediabetes as dependent variable was calculated for each biomarker. Model 1 was adjusted for sex and age, Model 2 additionally for cardiovascular risk factors, including waist-to-height ratio, hypertension, smoking, dyslipidaemia, and comorbidities including coronary artery disease, myocardial infarction, stroke, peripheral artery disease, atrial fibrillation, and chronic obstructive pulmonary disease as well as arthritis, hemostatic disorder, autoimmune disease and acute infection.

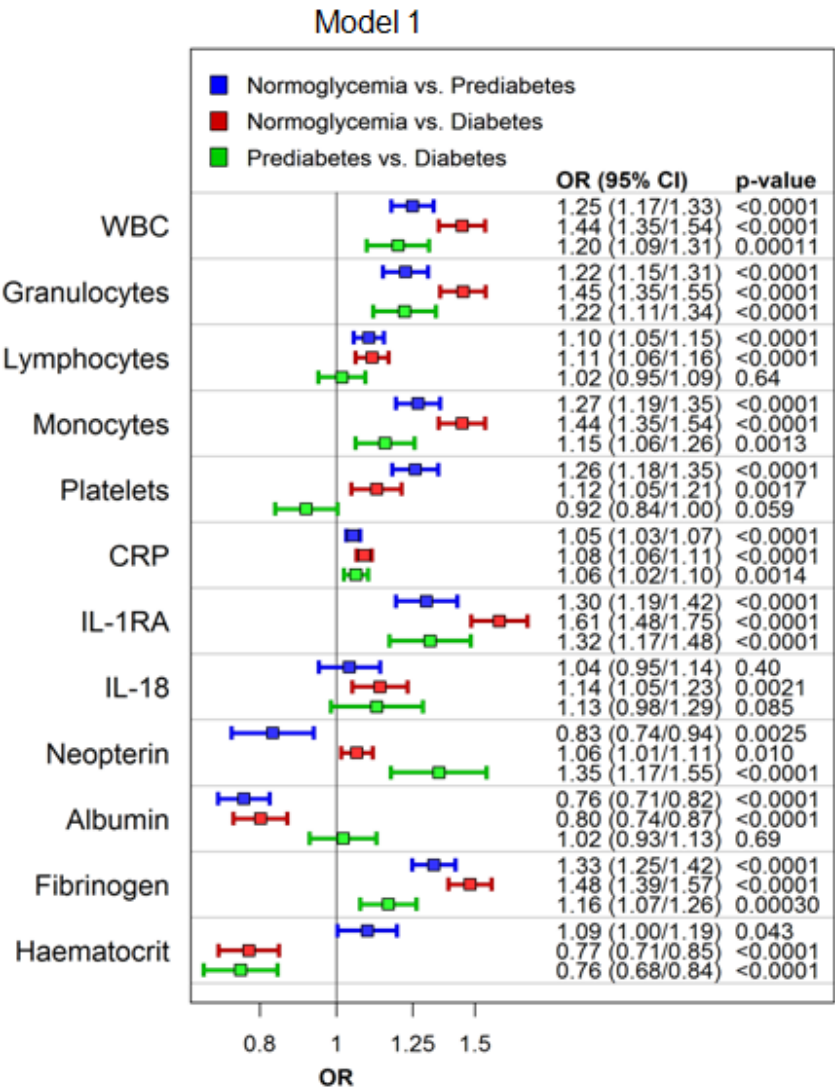

SUPPLEMENTARY DATA

Model 2

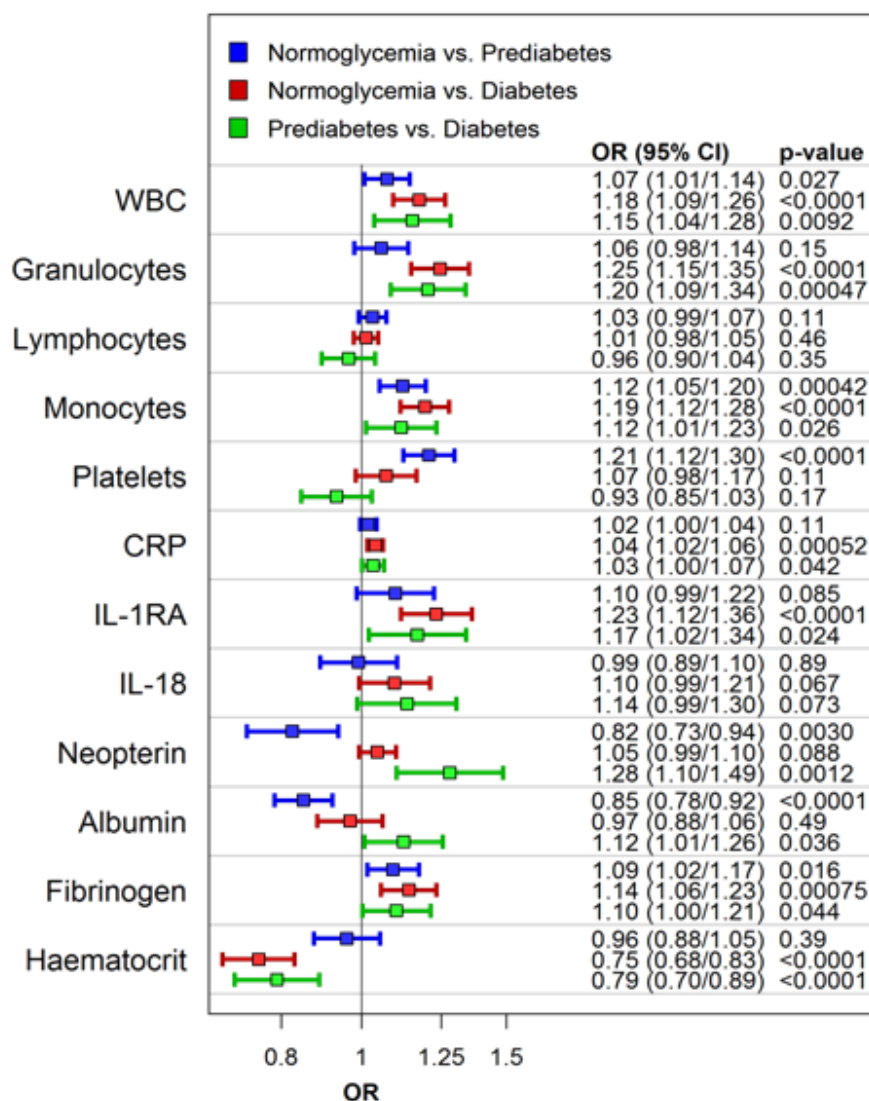

Supplement: dc143008supplementarydata.pdf [file dc143008supplementarydata.pdf]
